# Supplementary material for: Automated Mass Photometry of Adeno-Associated Virus Vectors from Crude Cell Extracts
Source: MDPI journal article supplement (doi:10.3390/ijms25020838), 2024-01-09
Supplement: s1 [file s1]

# Supplementary Materials

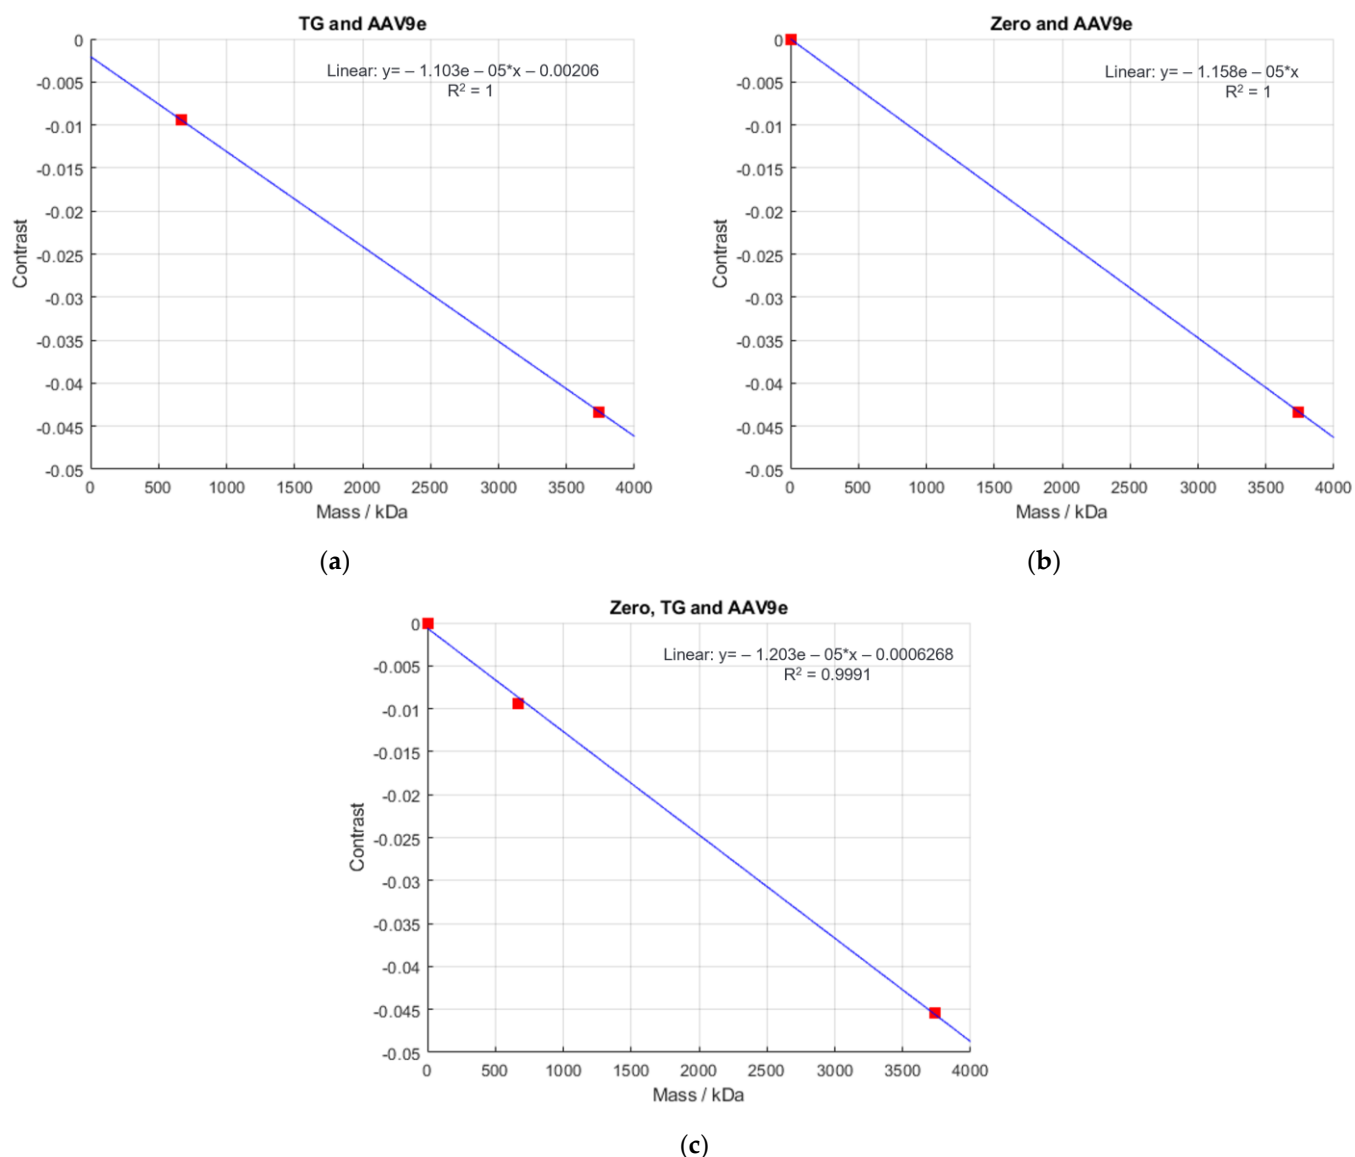

**Supplementary Figure S1.** Calibration curves obtained with (a) TG and AAV9e, (b) Zero and AAV9e and (c) Zero, TG and AAV9e.

**Supplementary Table S1.** Determination of the AAV subpopulations of an AAV9 sample consisting of ~33% empty, ~6% partially filled, ~52% full, and ~8% overfull particles under manual operation of the mass photometer using three different calibrations. x: two data points-based calibration with TG and AAV9e; y: two data points-based calibration with the zero point and AAV9; z: three data points-based calibration with the zero point, TG and AAV9e. E, PF, F and OF stand for empty, partially filled, full and overfull, respectively.

| Calibration     | AAV subpopulations |         |                |         |               |         |                |         |
|-----------------|--------------------|---------|----------------|---------|---------------|---------|----------------|---------|
|                 | Average E / %      | RSD / % | Average PF / % | RSD / % | Average F / % | RSD / % | Average OF / % | RSD / % |
| x <sup>1)</sup> | 40.4               | 5.5     | 7.0            | 9.3     | 50.5          | 3.4     | 2.1            | 16.8    |
| y <sup>2)</sup> | 40.6               | 5.2     | 7.4            | 6.7     | 50.1          | 3.7     | 1.9            | 16.6    |
| z <sup>3)</sup> | 41.9               | 5.1     | 10.1           | 7.3     | 46.5          | 3.8     | 1.5            | 20.5    |

<sup>1)</sup> TG and AAV9e, <sup>2)</sup> Zero and AAV9e, <sup>3)</sup> Zero, TG and AAV9e

**Supplementary Table S2.** Determination of the molar masses of empty and filled subpopulations and of the transgene size of an AAV9 sample consisting of ~33% empty, ~6% partially filled, ~52% full, and ~8% overfull particles under manual operation of the mass photometer using three different calibrations. x: two data points-based calibration with TG and AAV9e; y: two data points-based calibration with the zero point and AAV9; z: three data points-based calibration with the zero point, TG and AAV9e.

| Calibration     | Empty AAVs         |         | Full AAVs          |         | Calculated transgene size / kDa | RSD / % | Expected transgene size / kDa | Error / % |
|-----------------|--------------------|---------|--------------------|---------|---------------------------------|---------|-------------------------------|-----------|
|                 | Average mass / kDa | RSD / % | Average mass / kDa | RSD / % |                                 |         |                               |           |
| x <sup>1)</sup> | 3736               | 0.2     | 5211               | 0.4     | 1476                            | 0.8     | 1400                          | 5.4       |
| y <sup>2)</sup> | 3735               | 0.2     | 5139               | 0.3     | 1403                            | 0.6     | 1400                          | 0.2       |
| z <sup>3)</sup> | 3544               | 0.2     | 4896               | 0.3     | 1351                            | 0.7     | 1400                          | 3.5       |

<sup>1)</sup> TG and AAV9e, <sup>2)</sup> Zero and AAV9e, <sup>3)</sup> Zero, TG and AAV9e

**Supplementary Table S3.** Determination of the AAV subpopulations of an AAV9 sample consisting of ~33% empty, ~6% partially filled, ~52% full, and ~8% overfull particles under automated operation of the mass photometer using either the “buffer-free” or “buffer-dilution” focusing option. E, PF, F and OF stand for empty, partially filled, full and overfull, respectively.

|                 | AAV subpopulations |         |                |         |               |         |                |         |
|-----------------|--------------------|---------|----------------|---------|---------------|---------|----------------|---------|
|                 | Average E / %      | RSD / % | Average PF / % | RSD / % | Average F / % | RSD / % | Average OF / % | RSD / % |
| Buffer-free     | 38.6               | 13.8    | 8.7            | 14.9    | 48.9          | 5.8     | 3.8            | 50.1    |
| Buffer-dilution | 36.6               | 4.4     | 11.5           | 14.4    | 49.5          | 5.2     | 2.5            | 8.0     |

**Supplementary Table S4.** Determination of the molar masses of empty and filled subpopulations and of the transgene size of an AAV9 sample consisting of ~33% empty, ~6% partially filled, ~52% full, and ~8% overfull particles under automated operation of the mass photometer using either the “buffer-free” or “buffer-dilution” focusing option.

|                 | Empty AAVs         |         | Full AAVs          |         | Calculated transgene size / kDa | RSD / % | Expected transgene size / kDa | Error / % |
|-----------------|--------------------|---------|--------------------|---------|---------------------------------|---------|-------------------------------|-----------|
|                 | Average mass / kDa | RSD / % | Average mass / kDa | RSD / % |                                 |         |                               |           |
| Buffer-free     | 3789               | 1.8     | 5230               | 1.9     | 1441                            | 2.2     | 1400                          | 2.9       |
| Buffer-dilution | 3566               | 1.0     | 4922               | 0.9     | 1355                            | 0.9     | 1400                          | 3.2       |

**Supplementary Table S5.** Determination of the binding count rates for “buffer-free” and “buffer-dilution” sample measurements using an AAV9 sample consisting of ~33% empty, ~6% partially filled, ~52% full, and ~8% overfull particles under automated operation of the mass photometer.

|                 | Binding count rate |         |
|-----------------|--------------------|---------|
|                 | Binding events     | RSD / % |
| Buffer-free     | 2836               | 66.8    |
| Buffer-dilution | 5426               | 16.9    |

**Supplementary Table S6.** Determination of the AAV subpopulations of an AAV9 sample consisting of ~33% empty, ~6% partially filled, ~52% full, and ~8% overfull particles under automated operation of the mass photometer. The sample was measured five times on three consecutive days (days 1-3). E, PF, F and OF stand for empty, partially filled, full and overfull, respectively. E, PF, F and OF stand for empty, partially filled, full and overfull, respectively.

| MP    |                  |            |                   |            |                  |            |                   |            |
|-------|------------------|------------|-------------------|------------|------------------|------------|-------------------|------------|
|       | Average E /<br>% | RSD /<br>% | Average PF /<br>% | RSD /<br>% | Average F /<br>% | RSD /<br>% | Average OF<br>/ % | RSD /<br>% |
| Day 1 | 38.5             | 8.1        | 8.0               | 5.4        | 49.7             | 6.0        | 1.4               | 17.6       |
| Day 2 | 37.9             | 7.7        | 7.3               | 9.9        | 51.9             | 4.1        | 2.7               | 18.5       |
| Day 3 | 37.6             | 12.8       | 8.9               | 13.4       | 49.6             | 5.5        | 4.5               | 16.7       |

**Supplementary Table S7.** Determination of the molar masses of empty and filled subpopulations and of the transgene size under automated operation of the mass photometer. Results were generated by five repetitive measurements of an AAV9 sample (~33% empty, ~6% partially filled, ~52% full, and ~8% overfull AAV particles) on three consecutive days (days 1-3).

| Empty AAVs |                          | Full AAVs |                          |         |                                       |                                    |         |                                     |           |
|------------|--------------------------|-----------|--------------------------|---------|---------------------------------------|------------------------------------|---------|-------------------------------------|-----------|
|            | Average<br>mass /<br>kDa | RSD / %   | Average<br>mass /<br>kDa | RSD / % | Calculated<br>transgene<br>size / kDa | Average<br>transgene<br>size / kDa | RSD / % | Expected<br>transgene<br>size / kDa | Error / % |
| Day 1      | 3785                     | 0.5       | 5222                     | 0.5     | 1437                                  | 1440                               | 0.6     | 1400                                | 2.8       |
| Day 2      | 3788                     | 1.2       | 5237                     | 1.6     | 1448                                  |                                    |         |                                     |           |
| Day 3      | 3794                     | 1.8       | 5228                     | 1.7     | 1434                                  |                                    |         |                                     |           |
